# Supplementary material for: Affektive Mentalisierung als wahrgenommene Kontrollierbarkeit und Nützlichkeit von Emotionen
Source: Springer Nature journal article supplement (doi:10.1007/s00278-022-00633-7), 2022-12-20
Supplement: MOESM1 [file 23846046]

## Appendix A

### Validierung einer ersten deutschsprachigen Version des *Emotion Beliefs Questionnaire* (EBQ)

**Tabelle A1**

*Soziodemografische Daten der Stichprobe*

| Variable                        | Ausprägung                 | <i>n</i> *       | %                 |
|---------------------------------|----------------------------|------------------|-------------------|
| Geschlecht                      | Männlich                   | 108              | 32.9              |
|                                 | Weiblich                   | 219              | 66.8              |
| Höchster Schulabschluss         | Hauptschule                | 7                | 2.1               |
|                                 | Realschule/ Mittlere Reife | 56               | 17.1              |
|                                 | Fach-/ Abitur              | 147              | 44.8              |
|                                 | Fach-/ Hochschulabschluss  | 108              | 32.9              |
|                                 | Sonstiges                  | 5                | 1.5               |
| Monatliches Nettoeinkommen in € | Bis 450                    | 73               | 22.3              |
|                                 | 451 bis 1.000              | 61               | 18.6              |
|                                 | 1.001 bis 2.000            | 55               | 16.8              |
|                                 | 2.001 bis 3.000            | 77               | 23.5              |
|                                 | Mehr als 3.001             | 62               | 18.9              |
| Aktuell in fester Partnerschaft | Ja                         | 223              | 68.0              |
|                                 | Nein                       | 93               | 28.4              |
|                                 | Sonstiges                  | 12               | 3.7               |
| Sonntagfrage zur Bundestagswahl | Die Linke                  | 15               | 4.6               |
|                                 | SPD                        | 33               | 10.1              |
|                                 | Bündnis 90/ Die Grünen     | 99               | 30.2              |
|                                 | CDU/CSU                    | 40               | 12.2              |
|                                 | FDP                        | 29               | 8.8               |
|                                 | AfD                        | 2                | 0.6               |
| Alter                           |                            | <i>M</i> = 36.32 | <i>SD</i> = 17.25 |

*Anmerkungen.* \*Bei den meisten Items bestand die Möglichkeit mit *kann oder will ich nicht beantworten* zu antworten, sodass die Anzahl an fehlenden Werten variiert (Min. = 0, Max. = 110). *N* = 328.

Die Rekrutierung erfolgte von März 2021 bis Mai 2021 in der deutschen Allgemeinbevölkerung über den Bekanntenkreis der Studienleitenden im Schneeballverfahren, d.h. wir baten Bekannte um Teilnahme sowie um Weiterleitung des Links zur anonymen Online-Umfrage (Qualtrics Umfrageplattform) an weitere Bekannte. Einschlusskriterien bildeten ein Mindestalter von 18 Jahren und das Beherrschen der deutschen Sprache. Unsere finale Stichprobe bestand aus 328 Erwachsenen (219 weiblich, 108 männlich) mit einem Durchschnittsalter von 36.32 Jahren (18-80 Jahre, *SD* = 17.25). 370 weitere Teilnehmende (Dropout-Rate: 53.01%) wurden aufgrund eines frühzeitigen Abbruchs der Umfrage (Antwortrate 6.0% bis 40.0%) sowie eines geringen Alters (< 18 Jahre) ausgeschlossen.

**Tabelle A2**

*Items des englischsprachigen EBQ (Becerra et al., 2020) und unsere erste deutschsprachige Version*

|    | <b>Englischsprachiger EBQ</b>                                                                                                                                                                                                                                                                                                                                                                                                                           | <b>Deutschsprachiger EBQ</b>                                                                                                                                                                                                                                      |
|----|---------------------------------------------------------------------------------------------------------------------------------------------------------------------------------------------------------------------------------------------------------------------------------------------------------------------------------------------------------------------------------------------------------------------------------------------------------|-------------------------------------------------------------------------------------------------------------------------------------------------------------------------------------------------------------------------------------------------------------------|
|    | This questionnaire asks about your beliefs about emotions in general. Some questions ask about negative emotions (e.g., sadness, fear, and anger). Other questions ask about positive emotions (e.g., happiness, joy, and amusement). For each statement, please rate how much you agree or disagree that statement is true in general. (1 = <i>strongly disagree</i> , 2, 3, 4 = <i>neither agree nor disagree</i> , 5, 6, 7 = <i>strongly agree</i> ) | Bitte lesen Sie aufmerksam jede der folgenden 16 Behauptungen durch und markieren Sie eine Zahl von 1-7, je nachdem, in welchem Maße diese Behauptung für Sie zutrifft. (1 = <i>trifft überhaupt nicht zu</i> , 2, 3, 4, 5, 6, 7 = <i>trifft vollständig zu</i> ) |
| 1  | Once people are experiencing negative emotions, there is nothing they can do about modifying them.                                                                                                                                                                                                                                                                                                                                                      | Wenn Menschen erst einmal negative Gefühle erleben, können sie diese durch nichts verändern.                                                                                                                                                                      |
| 2  | People cannot control their positive emotions.                                                                                                                                                                                                                                                                                                                                                                                                          | Menschen können ihre positiven Gefühle nicht kontrollieren.                                                                                                                                                                                                       |
| 3  | There is very little use for negative emotions.                                                                                                                                                                                                                                                                                                                                                                                                         | Es gibt sehr wenig Nutzen von negativen Gefühlen.                                                                                                                                                                                                                 |
| 4  | Positive emotions are very unhelpful to people.                                                                                                                                                                                                                                                                                                                                                                                                         | <b>*Positive Gefühle sind für Menschen nicht hilfreich.</b>                                                                                                                                                                                                       |
| 5  | It doesn't matter how hard people try, they cannot change their negative emotions.                                                                                                                                                                                                                                                                                                                                                                      | Wie sehr sich die Menschen auch anstrengen, sie können ihre negativen Gefühle nicht verändern.                                                                                                                                                                    |
| 6  | People cannot learn techniques to effectively control their positive emotions.                                                                                                                                                                                                                                                                                                                                                                          | Menschen können keine Techniken erlernen, um ihre positiven Gefühle wirksam zu kontrollieren.                                                                                                                                                                     |
| 7  | People don't need their negative emotions.                                                                                                                                                                                                                                                                                                                                                                                                              | Menschen brauchen keine negativen Gefühle.                                                                                                                                                                                                                        |
| 8  | There is very little use for positive emotions.                                                                                                                                                                                                                                                                                                                                                                                                         | <b>*Es gibt sehr wenig Nutzen von positiven Gefühlen.</b>                                                                                                                                                                                                         |
| 9  | People cannot control their negative emotions.                                                                                                                                                                                                                                                                                                                                                                                                          | Menschen können ihre negativen Gefühle nicht kontrollieren.                                                                                                                                                                                                       |
| 10 | It doesn't matter how hard people try, they cannot change their positive emotions.                                                                                                                                                                                                                                                                                                                                                                      | Wie sehr sich Menschen auch anstrengen, sie können ihre positiven Gefühle nicht verändern.                                                                                                                                                                        |
| 11 | Negative emotions are harmful.                                                                                                                                                                                                                                                                                                                                                                                                                          | Negative Gefühle sind gefährlich.                                                                                                                                                                                                                                 |
| 12 | People don't need their positive emotions.                                                                                                                                                                                                                                                                                                                                                                                                              | <b>*Menschen brauchen keine positiven Gefühle.</b>                                                                                                                                                                                                                |
| 13 | People cannot learn techniques to effectively control their negative emotions.                                                                                                                                                                                                                                                                                                                                                                          | Menschen können keine Techniken erlernen, um ihre negativen Gefühle wirksam zu kontrollieren.                                                                                                                                                                     |
| 14 | Once people are experiencing positive emotions, there is nothing they can do about modifying them.                                                                                                                                                                                                                                                                                                                                                      | Wenn Menschen erst einmal positive Gefühle erleben, können sie diese durch nichts verändern.                                                                                                                                                                      |
| 15 | The presence of negative emotions is a bad thing for people.                                                                                                                                                                                                                                                                                                                                                                                            | Das Vorhandensein negativer Gefühle ist für Menschen eine schlechte Sache.                                                                                                                                                                                        |
| 16 | Positive emotions are harmful.                                                                                                                                                                                                                                                                                                                                                                                                                          | <b>*Positive Gefühle sind gefährlich.</b>                                                                                                                                                                                                                         |

*Anmerkungen.* Die Zahlen auf der linken Seite zeigen die Itemreihenfolge (1-16). \*Die Items der Subkala

*Positive-Usefulness*, welche in der Hauptstudie modifiziert wurden, sind fett markiert. In der Hauptstudie sind alternativ folgende Items verwendet worden: „Positive Gefühle sind nutzlos für Menschen“ (Item 4), „Der Nutzen von positiven Gefühlen ist sehr gering“ (Item 8), „Menschen brauchen ihre positiven Gefühle nicht“ (Item 12), „Es ist schädlich, positive Gefühle zu empfinden“ (Item 16).

**Faktorielle Validität****Tabelle A3**

*Itemanalyse der deutschsprachigen EBQ Version mit Ladungen der 3 festen Faktoren gemäß explorativer Faktorenanalyse (Hauptachsenanalyse mit Oblimin-Rotation)*

| EBQ-Item | Subskala                | <i>M</i> | <i>SD</i> | Faktorladungen<br>Faktoren |            |             | <i>h</i> <sup>2</sup> |
|----------|-------------------------|----------|-----------|----------------------------|------------|-------------|-----------------------|
|          |                         |          |           | 1                          | 2          | 3           |                       |
| 1        | General-Controllability | 2.52     | 1.30      | <b>.49</b>                 | .04        | -.04        | .25                   |
| 2        | General-Controllability | 3.43     | 1.75      | <b>.51</b>                 | -.16       | .07         | .24                   |
| 3        | Negative-Usefulness     | 3.22     | 1.79      | -.02                       | <b>.62</b> | -.08        | .39                   |
| 4        | Positive-Usefulness     | 1.50     | 1.10      | .20                        | .01        | .08         | .05                   |
| 5        | General-Controllability | 2.48     | 1.43      | <b>.60</b>                 | .02        | .14         | .40                   |
| 6        | General-Controllability | 2.48     | 1.54      | <b>.59</b>                 | -.08       | -.08        | .32                   |
| 7        | Negative-Usefulness     | 2.30     | 1.65      | .04                        | <b>.60</b> | -.10        | .38                   |
| 8        | Positive-Usefulness     | 1.50     | 0.95      | .33                        | .07        | .09         | .14                   |
| 9        | General-Controllability | 3.25     | 1.63      | <b>.49</b>                 | .17        | .13         | .36                   |
| 10       | General-Controllability | 2.88     | 1.60      | <b>.68</b>                 | .01        | -.16        | .47                   |
| 11       | Negative-Usefulness     | 4.03     | 1.84      | .03                        | <b>.65</b> | .38         | .58                   |
| 12       | Positive-Usefulness     | 1.19     | 0.62      | .24                        | .10        | -.03        | .08                   |
| 13       | General-Controllability | 2.27     | 1.51      | <b>.61</b>                 | .02        | -.05        | .38                   |
| 14       | General-Controllability | 2.62     | 1.46      | <b>.42</b>                 | .16        | <b>-.43</b> | .39                   |
| 15       | Negative-Usefulness     | 3.06     | 1.78      | -.00                       | <b>.72</b> | .02         | .52                   |
| 16       | Positive-Usefulness     | 2.16     | 1.43      | .22                        | .03        | <b>.58</b>  | .41                   |

*Anmerkungen.* Faktor 1: *General-Controllability*, Faktor 2: *Negative-Usefulness*, Faktor 3: *Positive-Usefulness*, Mittelwert (*M*), Standardabweichung (*SD*), Faktorladungen der Items auf die drei festen Faktoren (Oblimin-Rotation) 1, 2, 3 und Kommunalitäten (*h*<sup>2</sup>). *N* = 328. Faktorladungen  $\geq .40$  sind fett markiert.

In Anlehnung an Becerra et al. (2020) führten wir für die explorative Faktorenanalyse eine Hauptachsenanalyse mit Oblimin-Rotation durch, wobei wir eine dreifaktorielle Struktur vermuteten und entsprechend die Anzahl der zu extrahierenden Faktoren auf drei festlegten. Wie Tabelle A3 zu entnehmen ist, weist die explorative Faktorenanalyse in der vorliegenden Stichprobe an *N* = 328 Teilnehmenden der deutschen Allgemeinbevölkerung auf eine 3-Faktoren Struktur der deutschsprachigen Version des EBQ hin. Dabei liegen 13 der 16 Items mit einer Faktorladung  $\alpha \geq .40$  in einem signifikanten Bereich (Wertebereich  $\alpha = .42 - .72$ ). Item 4 („Positive Gefühle sind für Menschen nicht hilfreich“,  $\alpha = .20$ ), Item 8 („Es gibt sehr wenig Nutzen von positiven Gefühlen“,  $\alpha = .33$ ) und Item 12 („Menschen brauchen keine positiven Gefühle“,  $\alpha = .24$ ) erreichen diesen Wert nicht. Darüber hinaus laden diese in der Originalversion zur Erfassung der Kontrollierbarkeit positiver Emotionen verwendete Items mit  $\alpha = .20$  (Item 4),  $\alpha = .33$  (Item 8),  $\alpha = .24$  (Item 12) höher auf den Faktor 1 (*General-Controllability*) als auf den Faktor 3 (*Positive-Usefulness*) mit  $\alpha = .08$  (Item 4),  $\alpha = .09$  (Item 8),  $\alpha = -.03$  (Item 12).

### Reliabilität

Sowohl die Reliabilität der *Gesamtskala* des EBQ,  $\alpha = .79$ , als auch die der Skala *General-Controllability*,  $\alpha = .78$ , und der Skala *Negative-Usefulness*,  $\alpha = .74$ ., liegen in einem akzeptablen Bereich. Einzig die Reliabilität der Skala *Positive-Usefulness* ist als unakzeptabel einzustufen,  $\alpha = .42$ .

### Konkurrenente Validität

**Tabelle A4**

*Pearson Korrelationen zwischen den EBQ Skalen und den Skalen des FrAGe, ERQ und DASS*

|               | EBQ                     |                               |                     | Gesamtskala |
|---------------|-------------------------|-------------------------------|---------------------|-------------|
|               | General-Controllability | Subskalen Negative-Usefulness | Positive-Usefulness |             |
| <b>FrAGe</b>  |                         |                               |                     |             |
| Gesamtskala   | -.33***                 | -.28***                       | -.30***             | -.41***     |
| <b>ERQ</b>    |                         |                               |                     |             |
| Unterdrückung | .14*                    | .08                           | .16**               | .16**       |
| Neubewertung  | -.14**                  | .10†                          | -.11†               | -.07        |
| <b>DASS</b>   |                         |                               |                     |             |
| Depression    | .25***                  | .07                           | .20***              | .24***      |
| Angst         | .26***                  | .05                           | .24***              | .25***      |
| Stress        | .27***                  | .05                           | .22***              | .25***      |

*Anmerkungen.* † $p < .1$ , \* $p < .05$ , \*\* $p < .01$ , \*\*\* $p < .001$ . EBQ = *Emotion Beliefs Questionnaire*, FrAGe = *Fragebogen zur Akzeptanz von Gefühlen*, ERQ = *Emotion Regulation Questionnaire*.

Die Ergebnisse der ersten Stichprobe weisen auf überwiegend zufriedenstellende psychometrische Eigenschaften unserer ersten deutschsprachigen Version des EBQ hin. Die explorative Faktorenanalyse zeigt jedoch, dass die Faktorladungen der Items der Skala *Positive-Usefulness* (Items 4, 8, 12, 16) den signifikanten Bereich von  $\alpha \geq .40$  überwiegend nicht erreichen und die Reliabilität dieser Skala als unakzeptabel einzustufen ist,  $\alpha = .42$ . Da wir dies auf eine unpassende deutsche Wortwahl zurückführen, führten wir für diese Skala vier sprachlich modifizierte Items ein.

## Appendix B

### Affektive Mentalisierung, Empathie und Alexithymie

Der korrelativen Studie liegt eine A-priori-Poweranalyse mit der Annahme eines mittleren Effektes ( $r = .3$ ) zugrunde. Gemäß der Poweranalyse sollten über 134 Proband:innen online erhoben werden, um eine Power ( $1-\beta$ ) von 95% bei einem Alpha-Niveau von .05 zu erreichen.

**Tabelle B1**

*Soziodemografische Daten der Stichprobe*

| Variable                             | Ausprägung                 | <i>n</i> *                   | %                          |
|--------------------------------------|----------------------------|------------------------------|----------------------------|
| Muttersprache                        | Englisch                   | 144                          | 96.6                       |
|                                      | Anderes                    | 5                            | 3.4                        |
| US-amerikanische Staatsangehörigkeit | Ja                         | 147                          | 98.7                       |
|                                      | Nein                       | 2                            | 1.3                        |
| Minderheit                           | Ja                         | 33                           | 22.1                       |
|                                      | Nein                       | 112                          | 75.2                       |
|                                      | Will ich nicht beantworten | 4                            | 2.7                        |
| Höchster Bildungsabschluss           | High-School No Diploma     | 1                            | 0.7                        |
|                                      | High-School Diploma        | 15                           | 10.1                       |
|                                      | College                    | 34                           | 22.8                       |
|                                      | Associate Degree           | 19                           | 12.8                       |
|                                      | Bachelorabschluss          | 59                           | 39.6                       |
|                                      | Masterabschluss            | 14                           | 9.4                        |
| Jährliches Einkommen in \$           | Dokortitel                 | 7                            | 4.7                        |
|                                      | Bis 25.000                 | 22                           | 14.8                       |
|                                      | 25.000 bis 50.000          | 56                           | 37.6                       |
|                                      | 50.000 bis 100.000         | 53                           | 35.6                       |
|                                      | 100.000 bis 250.000        | 16                           | 10.7                       |
| Beziehungsstatus                     | Mehr als 250.000           | 2                            | 1.3                        |
|                                      | Single                     | 62                           | 41.6                       |
|                                      | Verheiratet                | 62                           | 41.6                       |
|                                      | Geschieden                 | 18                           | 12.1                       |
|                                      | Getrennt                   | 2                            | 1.3                        |
| Alter                                | Verwitwet                  | 5                            | 3.4                        |
|                                      |                            | $M = 42.65,$<br>$SD = 13.71$ | Spannweite:<br>21-73 Jahre |

*Anmerkungen.* Die Rekrutierung der Stichprobe erfolgte online über CloudResearch in der US-amerikanischen Allgemeinbevölkerung.  $N = 149$ .

**Tabelle B2**

*Pearson Korrelationen zwischen den EBQ Skalen und den Skalen der TAS-20 und dem IRI*

|                    | EBQ                     |                                  |                     | Gesamtskala |
|--------------------|-------------------------|----------------------------------|---------------------|-------------|
|                    | General-Controllability | Subskalen<br>Negative-Usefulness | Positive-Usefulness |             |
| <b>TAS-20</b>      |                         |                                  |                     |             |
| Gesamtskala        | .34***                  | .17*                             | .34***              | .34***      |
| <b>IRI</b>         |                         |                                  |                     |             |
| Perspective taking | -.21*                   | -.10                             | -.24**              | -.21**      |

*Anmerkungen.* † $p < .1$ , \* $p < .05$ , \*\* $p < .01$ , \*\*\* $p < .001$ . EBQ = *Emotion Beliefs Questionnaire*, TAS-20 = *Twenty-item Toronto Alexithymia Scale*, IRI = *Interpersonal Reactivity Index – perspective taking subscale*.
